# Supplementary material for: Novel pedigree analysis implicates DNA repair and chromatin remodeling in multiple myeloma risk
Source: PubMed Central journal article supplement (PMC5794067; doi:10.1371/journal.pgen.1007111), 2018-02-01
Supplement: pgen.1007111.s006.pdf [file pgen.1007111.s006.pdf]

**S3 Table. GG-NER Incision Complex genes.** Burden testing results (based on 1063 MM/MGUS cases and 964 unaffected controls), SGS and prioritized SNV results, and intolerance to missense and loss of function variants (based on ExAC population data).

| Gene          | Position               | Burden (p-value)   | SGS         | SNV | Intolerance to MS (Z) | Intolerance to LoF (pLI) |
|---------------|------------------------|--------------------|-------------|-----|-----------------------|--------------------------|
| <i>USP45</i>  | 6:99880182-99963565    | 0.711              | significant | Y   | -0.74                 | 0.00                     |
| <i>CHD1L</i>  | 1:146714291-146767447  | 0.006 <sup>‡</sup> |             |     | -1.82                 | 0.00                     |
| <i>PARP1</i>  | 1:226548392-226595801  | 0.036 <sup>‡</sup> |             |     | 0.57                  | 0.01                     |
| <i>RPA2</i>   | 1:28218049-28241236    | 0.019 <sup>‡</sup> |             |     | 0.41                  | 0.89                     |
| <i>ERCC3</i>  | 2:128014866-128051752  | 0.020 <sup>‡</sup> |             | Y   | 1.17                  | 0.00                     |
| <i>GTF2H2</i> | 5:70330951-70363497    | 0.005 <sup>‡</sup> |             |     | 2.27                  | 0.72                     |
| <i>GTF2H5</i> | 6:158589379-158620376  | 0.532              |             |     | -0.70                 | 0.05                     |
| <i>GTF2H4</i> | 6:30875977-30882814    | 0.930              |             |     | 0.74                  | 0.26                     |
| <i>RPA3</i>   | 7:7676575-7758238      | 1.000              |             |     | -0.73                 | 0.00                     |
| <i>XPA</i>    | 9:100437191-100459691  | 0.104              |             |     | 0.52                  | 0.00                     |
| <i>GTF2H1</i> | 11:18343816-18388590   | 0.001 <sup>‡</sup> |             |     | 0.59                  | 1.00                     |
| <i>DDB2</i>   | 11:47236493-47260769   | 0.929              |             |     | 1.25                  | 0.01                     |
| <i>DDB1</i>   | 11:61066919-61100684   | 0.001 <sup>‡</sup> |             |     | 5.67                  | 1.00                     |
| <i>GTF2H3</i> | 12:124118286-124147151 | 0.957              |             |     | 0.04                  | 0.00                     |
| <i>ERCC5</i>  | 13:103504468-103524748 | 0.462              |             |     | -0.61                 | 0.00                     |
| <i>CUL4A</i>  | 13:113863931-113919392 | 0.390              |             |     | 2.73                  | 1.00                     |
| <i>PARP2</i>  | 14:20811773-20826063   | 0.190              |             |     | -0.55                 | 0.00                     |
| <i>ERCC4</i>  | 16:14014014-14046205   | 0.371              |             | Y   | -1.06                 | 0.00                     |
| <i>RPA1</i>   | 17:1733273-1802848     | 0.480              |             |     | 0.43                  | 0.31                     |
| <i>ERCC2</i>  | 19:45854649-45873845   | 0.503              | suggestive  |     | 0.44                  | 0.00                     |
| <i>ERCC1</i>  | 19:45910591-45927177   | 0.402              | suggestive  |     | -0.13                 | 0.00                     |
| <i>RBX1</i>   | 22:41347351-41369019   | -                  |             |     | 2.68                  | 0.94                     |
| <i>CUL4B</i>  | X:119658446-119709684  | -                  | -           |     | 3.88                  | 1.00                     |

**Legend:** Position – build HG19; Burden – p-values based on the c-alpha test of high-impact variants with AAF < 0.001 (see Methods section), “-” indicates gene not tested (no variants observed), <sup>‡</sup>significant after multiple testing correction p < 0.0022 (=0.05/23), <sup>†</sup>nominally significant p < 0.05; SGS – gene captured by a genome-wide significant or suggestive shared genomic segment, “-” indicates not tested (SGS only looks at autosomal chromosomes); SNV – “Y” indicates a single nucleotide variant with AAF < 0.001, high or moderate deleteriousness, and observed segregating in a high-risk MM pedigree or pathogenic in ClinVar; Intolerance to MS – gene’s intolerance to missense variants based on analysis of ExAC data<sup>41</sup>, signed Z score based on deviation of observed counts from expected, positive Z indicates intolerance to variation; LoF – based on analysis of ExAC data<sup>41</sup>, Loss of Function (LoF) variants include splice donor or acceptor or non-sense SNVs, genes with a probability of LoF Intolerance (pLI) >= 0.9 are considered extremely intolerant to LoF SNVs.
